# Supplementary material
Source: Research Square preprint supplement (doi:10.21203/rs.3.rs-10131246/v1)
Supplement: Supplementary file 1 [file 9ec6ee08b64b63d253c6f049.docx]

**Supporting Information**

**Interfacial Engineering and Charge-Transfer Mechanisms of Inorganic CdS/TiO2 Semiconductor Nanocomposites: Kinetic Modeling and Photocorrosion Inhibition**

Nur Mutheerah Antal,1 Chi Huey Ng,1,2* Siow Hwa Teo,3# Boon Junn Ng,4 Zhenhua Xu,5 Putao Zhang,6 Nur Syamimi Zainudin,7,8 Hong Ngee Lim,7 Jidon Janaun,1 Rosalam Hj Sarbatly1,2

1Faculty of Engineering, Universiti Malaysia Sabah, Jalan UMS, Kota Kinabalu, 88400, Sabah, Malaysia.

2Membrane and Nanomaterials Technology Research Laboratory, Faculty of Engineering, Universiti Malaysia Sabah, Jalan UMS, Kota Kinabalu, 88400, Sabah, Malaysia.

3Faculty of Science and Technology, Universiti Malaysia Sabah, Kota Kinabalu, 88400, Sabah, Malaysia.

4School of Energy and Chemical Engineering, Xiamen University Malaysia, Jalan Sunsuria, Bandar Sunsuria, 43900, Sepang, Selangor Darul Ehsan, Malaysia.

5School of Materials Science and Engineering, Ningbo Tech University, Ningbo 315100, China.

6Henan Key Laboratory of Quantum Materials and Quantum Energy, Henan University, Kaifeng, 475004, Henan, China.

7Department of Chemistry, Faculty of Science, Universiti Putra Malaysia, UPM Serdang, 43400, Selangor, Malaysia.

8Faculty of Applied Sciences, Universiti Teknologi MARA Cawangan Pahang, Kampus Jengka, 26400 Bandar Tun Abdul Razak Jengka, Pahang, Malaysia.

**Corresponding authors:**

*CH Ng: [chihueyng@ums.edu.my](mailto:chihueyng@ums.edu.my)

#SH Teo: [tony@ums.edu.my](mailto:tony@ums.edu.my)

**
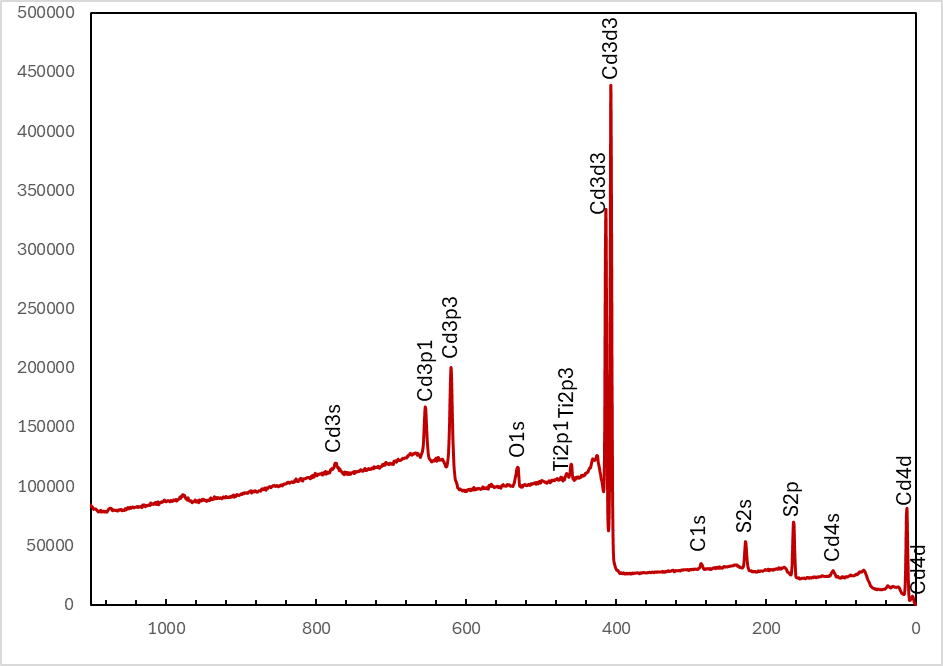
**

**Figure S1.** XPS wide scan of C3T1.

**
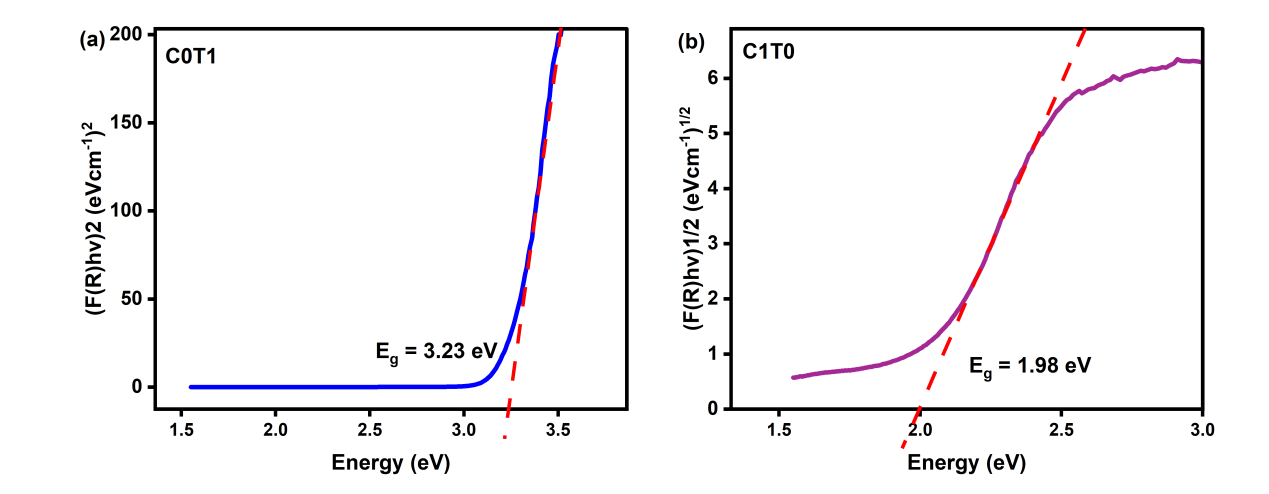
**

**Figure S2.** Tauc plot of (a) C0T1 and (b) C1T0


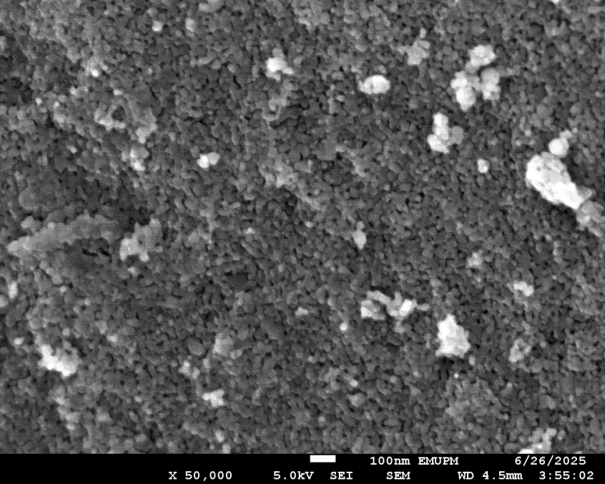

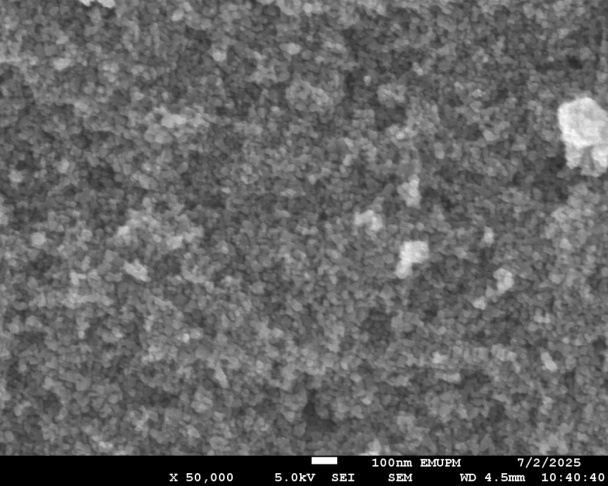


**(b)**

**(a)**

**C3T1**

**C0T1**

**Figure S3.** FESEM images of (a) C0T1 and (b) C3T1.


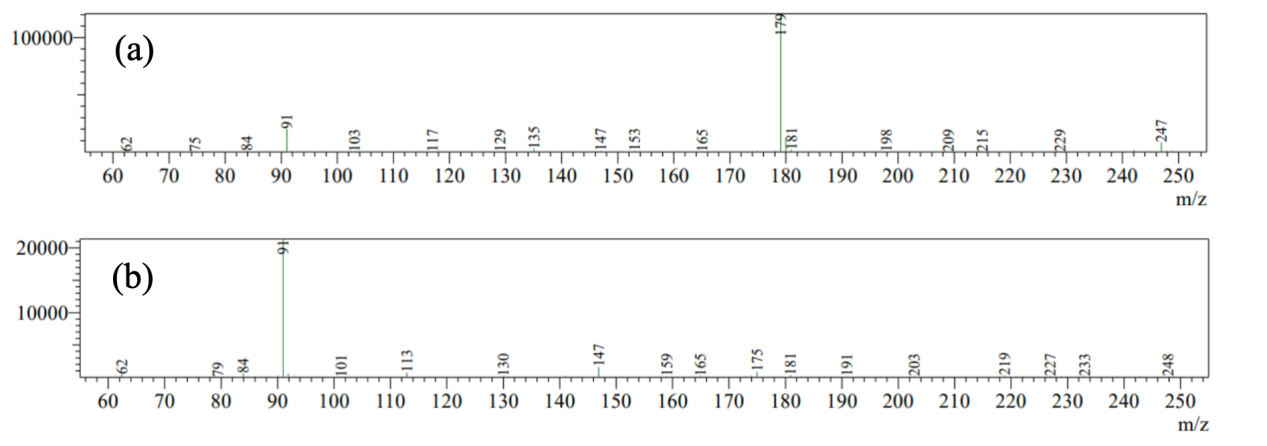


**Figure S4.** LC–MS total ion chromatograms (TIC) of caffeic acid before and after 300 min photocatalytic degradation using C3T1 photocatalyst. Initially, a major caffeic acid peak was observed at 179 m/z, which completely disappeared after treatment. The presence of new peaks at 91 m/z to polar degradation intermediates such as phenolic derivatives and low–molecular weight organic acids, confirming effective photocatalytic breakdown and progression toward mineralization.


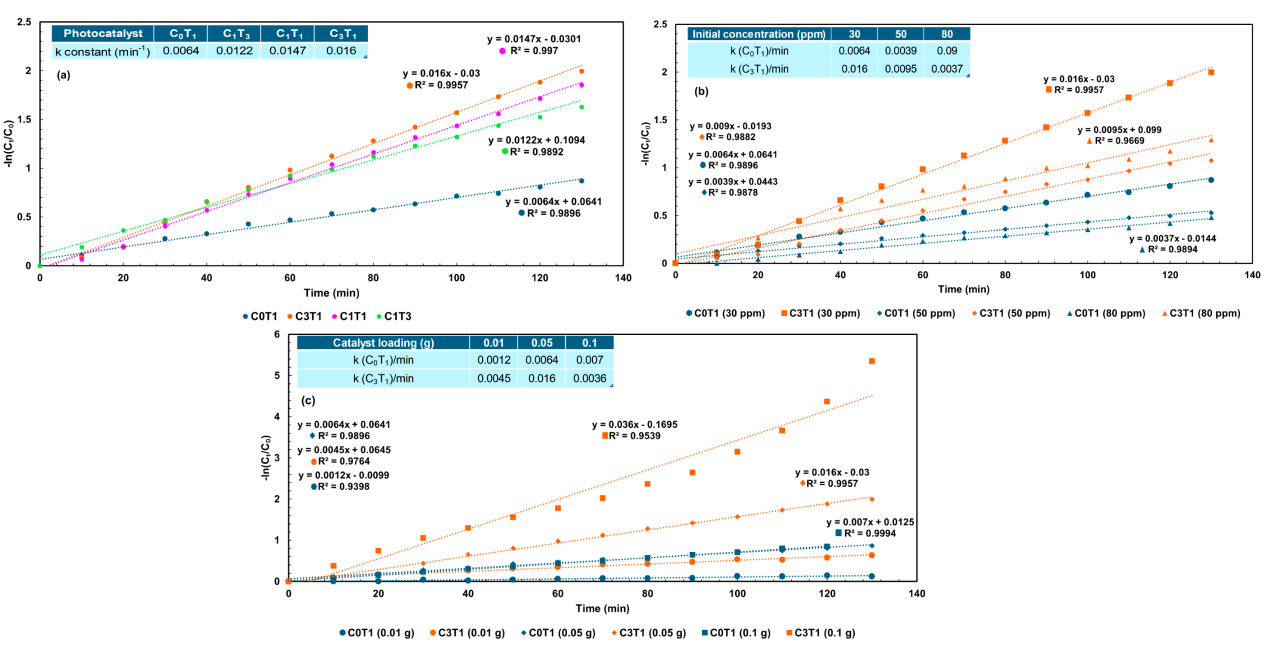


**Figure S5.** Pseudo-first-order kinetics model for (a) molar ratio of CdS:TiO2, (b) initial concentration of caffeic acid, and (c) catalyst loading of C0T1 and C3T1.
